1 **Title:** Seasonality of acute kidney injury phenotypes in England: an unsupervised machine  
2 learning classification study of electronic health records

3  
4 Authors: Hikaru Bolt<sup>1</sup>, Anne Suffel<sup>1</sup>, Julian Matthewman<sup>1</sup>, Frank Sandmann<sup>1\*</sup>, Laurie Tomlinson<sup>1</sup>,  
5 Rosalind Eggo<sup>1</sup>

6  
7 <sup>1</sup> London School of Hygiene and Tropical Medicine, Keppel Street, London WC1E 7HT, UK  
8 \* Present address: European Centre for Disease Prevention and Control (ECDC), Stockholm,  
9 Sweden

## 10 **Research in context**

11

## 12 **Evidence before this study**

13

14 We searched for articles in Medline using the terms (“Seasons/” OR “Seasons”) AND (“Acute  
15 Kidney Injury/” OR “Acute Kidney Injury” OR “AKI” OR “ARF”). We also search Embase using  
16 the terms (“Seasonal variation/” OR “Seasonal variation” OR “Season/” OR “Season”) AND  
17 (“Acute kidney failure/” OR “Acute kidney failure” OR “AKI” OR “ARF”. Articles published until  
18 20/01/2023 in any language were included. Only two studies investigated seasonality of AKI in  
19 the UK and indicated winter increases in admissions. However, both studies aggregate AKI  
20 hospitalisations into quarterly counts and therefore were unable to show acute weekly changes  
21 in AKI admissions and timings of peaks. Studies outside of the UK varied in their conclusions of  
22 summer or winter increases in AKI admissions and the profile of patients driving this variation.

23

## 24 **Added value of this study**

25

26 This is the largest and most granular investigation of AKI seasonality in England, investigating  
27 198,754 admissions in a weekly time series detecting acute changes in incidence and  
28 differences in peaks year to year. We demonstrate consistent peaks in the winter as well as  
29 acute peaks in the summer. Most records indicated AKI was diagnosed on admission therefore  
30 suggestive of community triggers of AKI. We included more data on the profile of patients than  
31 previously published studies. Our novel approach to investigate the profile of seasonal  
32 admissions using unsupervised machine learning suggests some groups may be more affected  
33 by seasonal triggers than others.

34

## 35 **Implications of all the available evidence**

36

37 AKI is a common syndrome which leads to hospitalisation with a significant burden on the health  
38 system. We demonstrate a conclusive seasonal pattern to AKI admissions which has important  
39 implications on healthcare provision planning, public health, and clinical practice in England.  
40 Future research on AKI should take into account seasonality; uncertainty remains on the main  
41 drivers and aetiology of the seasonal patterns observed.

42

43 **Abstract**

44

45 **Background:** Acute Kidney Injury (AKI) is a multifactorial condition which presents a substantial  
46 burden to healthcare systems. There is limited evidence on whether it is seasonal. We sought to  
47 investigate the seasonality of AKI hospitalisations in England and use unsupervised machine  
48 learning to explore clustering of underlying comorbidities, to gain insights for future intervention.

49

50 **Methods:** We used Hospital Episodes Statistics linked to the Clinical Practice Research  
51 Datalink to describe the overall incidence of AKI admissions between 2015-2019 weekly by  
52 demographic and admission characteristics. We carried out dimension reduction on 850  
53 diagnosis codes using multiple correspondence analysis and applied k-means clustering to  
54 classify patients. We phenotype each group based on the dominant characteristics and describe  
55 the seasonality of AKI admissions by these different phenotypes.

56

57 **Findings:** Between 2015-2019, weekly AKI admissions peaked in winter, with additional  
58 summer peaks related to periods of extreme heat. Winter seasonality was more evident in those  
59 diagnosed with AKI on admission. From the cluster classification we describe six phenotypes of  
60 people admitted to hospital with AKI. Among these, seasonality of AKI admissions was  
61 observed among people who we described as having a multimorbid phenotype, established risk  
62 factor phenotype, and general AKI phenotype.

63

64 **Interpretation:** We demonstrate winter seasonality of AKI admissions in England, particularly  
65 among those with AKI diagnosed on admission, suggestive of community triggers. Differences  
66 in seasonality between phenotypes suggests some groups may be more likely to develop AKI  
67 as a result of these factors. This may be driven by underlying comorbidity profiles or reflect  
68 differences in uptake of seasonal interventions such as vaccines.

69

70 **Funding:** This study was funded by the National Institute for Health and Care Research (NIHR)  
71 Health Protection Research Unit (HPRU) in Modelling and Health Economics, a partnership  
72 between UK Health Security Agency (UKHSA), Imperial College London, and London School of  
73 Hygiene and Tropical Medicine. The views expressed are those of the authors and not  
74 necessarily those of the National Health Service, NIHR, UK Department of Health or UKHSA.

75

## 76 **Background**

77 Acute kidney injury (AKI) is a syndrome defined by rapid decline in kidney function from hours to  
78 days leading to disruption in metabolic, electrolyte, and fluid homeostasis (1). Between 20-25%  
79 of hospitalised adults have AKI, and it is associated with longer duration of stay and a 4-16 fold  
80 increase in odds of death following hospitalisation (1–3). The heterogeneity of the condition and  
81 its triggers and the wide range of risk factors makes it difficult to identify important mechanisms  
82 which can be modified to reduce the incidence of AKI (1).

83 Previous studies have demonstrated a seasonal winter pattern to AKI hospital admissions (4–6).  
84 Data from a Welsh automated electronic AKI reporting system found an increase in AKI alerts  
85 during winter in primary and secondary care (4). Furthermore, a study in Japan indicated an  
86 increased odds of AKI in winter months with seasonality most pronounced for patients primarily  
87 diagnosed with cardiovascular and pulmonary admission codes, and when AKI was diagnosed  
88 on the day of admission (5). While winter increases in AKI suggest association with infections (7),  
89 other conditions associated with AKI such as heart failure and myocardial infarction also have  
90 seasonal patterns (8–11).

91 Given the high incidence and complex, multifactorial aetiology of AKI the condition is well suited  
92 to analysis using machine learning (ML) (12–14). ML is increasingly used to analyse electronic  
93 health records (EHR) for risk prediction models, causal inference, text mining, and phenotypic  
94 discovery methods (12–14). Previous studies using unsupervised clustering classification of EHR  
95 data include studies such as identifying clinical phenotypes of heart failure, Alzheimer’s disease,  
96 and chronic obstructive pulmonary disease to describe the diversity of expression, progression,  
97 and aetiology of patients experiencing the same disease (14–16). The primary benefit of  
98 unsupervised clustering classification is the ability to analyse large datasets without pre-specifying  
99 hypotheses or interactions, and without limiting the number of features included to phenotype  
100 patients (17). ML methods could uncover new and important phenotypes of AKI not previously  
101 considered for detailed epidemiological investigation, and new targets for intervention.

102 Therefore, in this study using routine primary and secondary care data from England, we sought  
103 to firstly determine whether there is seasonality in AKI admissions in England, and any  
104 associations with age and gender, and secondly to use unsupervised ML clustering approaches  
105 to investigate AKI phenotypes, and whether these also demonstrated seasonality.

## 106 **Methods**

107

### 108 **Data source**

109

110 We used linked primary and secondary care data from England in CPRD GOLD, which is a  
111 large primary care database collecting longitudinal EHRs from participating GPs representing 21  
112 million patients with 3 million currently registered (18). Data is quality assured and includes  
113 demographic characteristics, diagnoses and symptoms, drug exposures, vaccination history,  
114 laboratory tests, and referrals to secondary care (18). Data are recorded using Read codes, a  
115 standardised hierarchical coding structure to describe a patient's consultation and condition.

116 CPRD has been shown to be representative of the UK population by age, sex, and ethnicity  
117 (17).

118  
119 In 2019, 52% of CPRD GOLD patients were linked to hospital episode statistics (HES) which  
120 records hospital admissions, attendances to Accident & Emergency, and outpatient  
121 appointments to all NHS hospitals. Data in HES are recorded using the International  
122 Classification of Diseases version 10 (ICD-10) codes, where each code represents a diagnosis,  
123 which are grouped under 22 headings in a hierarchical structure.

124

## 125 **Study population**

126 We defined the source population as all patients recorded between January 2015 – December  
127 2019, that met research acceptable quality control standards (18) . We defined the cohort as  
128 patients admitted to hospital with an AKI ICD-10 code (ICD-10 N-17 and N-19) in any diagnostic  
129 position during an admission (Supplementary table 1).

## 130 **Feature selection**

131 We extracted linked primary care records for the study population which were stored as Read  
132 codes. We mapped the Read codes to the relevant hierarchy from specific to general terms, and  
133 we prepared the features for clustering at level 3 (e.g. G30.. - Acute myocardial infarction).

134 We included diagnosis codes as features for the cluster classification (Supplementary table 2),  
135 and age and sex were included as supplementary variables, used to describe the cluster but not  
136 included in the cluster classification algorithm. We excluded codes relating to symptoms, medical  
137 procedures, and lifestyle factors (Supplementary table 3), as well as Read code chapter Z  
138 (Unspecified conditions) to reduce the number of features included to improve processing  
139 capacity. We excluded features recorded less than 100 times in the observation period across all  
140 patients in order to reduce the computational burden, and made the assumption that these  
141 features will not have a material impact on clusters formed due to the low frequency. Diagnosis  
142 codes relating to infectious diseases (Chapter A - Infectious and parasitic diseases; Chapter H0  
143 - Acute respiratory infections; Chapter H1 - Other upper respiratory tract diseases; Chapter H2 -  
144 Pneumonia and influenza; Chapter K190 - Urinary tract infection, site not specified) were removed  
145 if they were more than 30 days before or anytime after the AKI hospitalisation. This was done in  
146 order to reflect the acute nature of these diagnoses, and time bounding these codes selected the  
147 diagnoses possibly associated with subsequent development of AKI. Without this, infection codes  
148 unrelated to AKI in time would have a dominant impact in the formation of clusters.

149 To prepare for cluster classification, we transformed the data into a matrix indicating the presence  
150 and absence of codes for each patient.

## 151 *Dimension reduction*

152 We used Multiple Correspondence Analysis (MCA) as a dimension reduction technique (15,19).  
153 Dimension reduction improves the efficiency of clustering methods, while preserving the global

154 structure and correlation between data points (19). We selected the optimum number of  
155 dimensions using a scree plot to observe the percentage of variance in each dimension (19). We  
156 applied the “elbow rule” to the plot to determine the number of dimensions to retain.

### 157 *K-means clustering and phenotyping*

158 We used k-means clustering to classify patients into groups. K-means clustering classifies  
159 patients into a pre-specified number of groups based on the distance from mean centre points  
160 that minimises the total within-cluster sum of squares (15). Patients with similar characteristics  
161 are therefore classified in the same clusters. We selected the optimum number of clusters using  
162 the *NbClust* package (20). This package calculates the optimum number of clusters using 30  
163 different indices and aggregates the results for the user to make an assessment of the optimum  
164 number of clusters in the dataset of interest (20). Due to the computational burden of applying  
165 different indices, a random sample of 25,000 patients from the cohort were selected to apply the  
166 method. To ensure consistency, five random samples were taken.

167 Once we allocated patients to clusters we used the frequency of clinical codes in each cluster to  
168 describe the dominant characteristics of each, using Read code chapter level 2.

### 169 **Analysis**

170 We described the overall incidence of AKI admissions between 2015-2019 and disaggregated by  
171 age, sex, diagnostic position of AKI code, and the day during the admission where AKI was  
172 recorded. We described the clusters of AKI patients by age, sex, and Read codes at chapter level  
173 2. All Read codes were reviewed for describing the cluster, however 17 codes were selected for  
174 illustrative purposes and cover codes mostly commonly reported as well as being plausible risk  
175 factors for AKI. We labelled clusters with the description of the overall phenotype of the cluster  
176 based on the dominant characteristics observed. We then described the incidence of AKI  
177 admissions by the cluster phenotypes.

### 178 **Sensitivity analysis**

179 We conducted sensitivity analysis of the cluster phenotypes by 1) restricting the cohort to those  
180 who had an AKI ICD10 code of N17 (i.e. excluding N19 codes) 2) restricting the cohort to those  
181 where AKI was recorded in a primary diagnostic position and separately a secondary diagnostic  
182 position, 3) restricting the cohort to those diagnosed with AKI on admission (day 0), 4) setting  
183 random seeds to test the reproducibility of the clustering method, and 5) changing the number  
184 of dimensions included for the cluster analysis following MCA to observe the impact on the  
185 cluster phenotypes.

### 186 **Role of the funding source**

187 The funder had no role in the design, analysis, interpretation of the study results, writing of the  
188 report, or the decision to submit the paper for publication.

### 189 **Results**

190

191 *Incidence*

192

193 Among the cohort of 133,488 individual patients recorded to have an admission with AKI in  
194 England, between 2015-2019, there were a total of 198,754 admissions.. 52% were male and  
195 the median age was 78 (IQR: 66-86). AKI incidence increased over the entire observation  
196 period from 34,539 admissions in 2015 to 42,326 admissions in 2019. We observed distinct  
197 peaks in AKI admissions in December and January of each year (Figure 1, Supplementary  
198 figure 1), as well as June-July.

199

200 *Winter seasonality*

201

202 There were seasonal peaks in admissions among men and women (Figure 1A), most  
203 prominently observed in people aged >75 (Figure 1D). AKI admission codes recorded on day 0-  
204 1 of the admission had evidence of seasonality, with no seasonality observed where AKI was  
205 recorded >2 days after admission (Figure 1B). Analysis of diagnostic position of AKI codes also  
206 demonstrated that seasonality is more apparent where AKI was recorded as non-primary  
207 reason for admission (diagnostic position >2) (Figure 1C). Among those with a secondary AKI  
208 code, the most common primary reasons for admissions were pneumonia, urinary tract  
209 infections (UTIs), sepsis, heart failure, and chronic obstructive pulmonary disease (COPD)  
210 (Supplementary table 4). These codes make up 30% of admissions where AKI was recorded as  
211 secondary code. Seasonality was most notable for admissions where pneumonia was the  
212 primary diagnosis (Figure 1E).

213

214 *Summer seasonality*

215

216 We observed short peaks in the summer of each year; one to two weeks in duration. These  
217 peaks were observed among men and women (Figure 1A) and across age groups (Figure 1D),  
218 although not consistently across all years. Summer peaks were only observed where people  
219 were coded with AKI on day 0-1 of admission (Figure 1B), and were observed where AKI was  
220 recorded as a primary or secondary diagnostic position (Figure 1C). These periods of increased  
221 AKI admissions in the summer across all years, coincide with heatwave alerts declared by the  
222 Meteorological Office in England (21) (Supplementary figure 2).

223



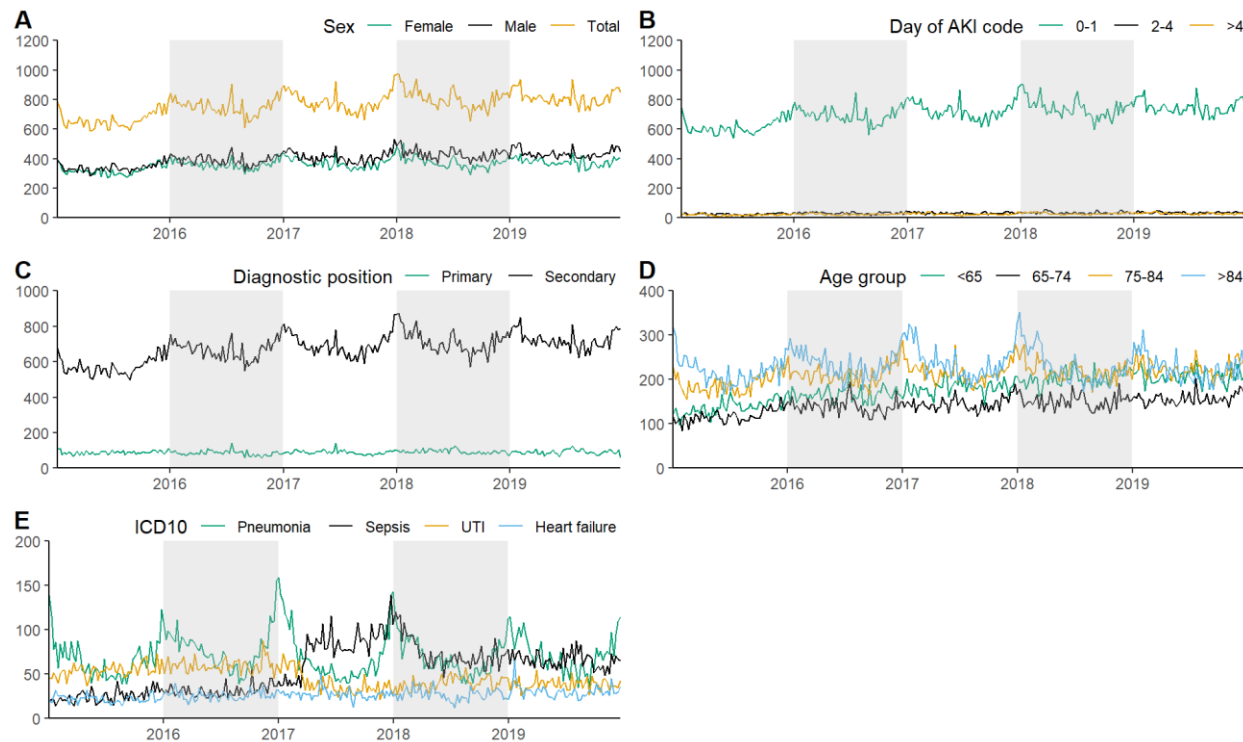

224  
225

226 **Figure 1: AKI admissions in HES-linked CPRD 2015-2019.** Time series of weekly AKI admissions,  
227 2015 - 2019, England total and by A) sex of patients B) day AKI code was recorded during the admission  
228 C) diagnostic position of AKI record D) age group E) primary diagnosis where AKI was a secondary code  
229 during the admission (primary diagnoses displayed make up 30% of all primary diagnoses recorded).

230

### 231 Cluster classification

232

233 There were 133,488 patients that were diagnosed with AKI during an admission between 2015-  
234 2019. Among these patients there were 1,788 chapter level 3 Read codes available for  
235 dimension reduction using MCA. Of these, 938 codes were recorded less than 100 times across  
236 all patients in the time period, and were excluded. Thus 850 features were retained, which made  
237 up 99.6% of records reported among the cohort. Following exclusion of sparsely recorded  
238 variables, 130,625 patients were retained for the cluster analysis.

239

240 Following dimension reduction we retained five dimensions for cluster analysis (Supplementary  
241 figure 3). K-means clustering was applied to the five dimensions, and the analysis of different  
242 indices selected between two to 10 clusters as the optimum number of clusters (Supplementary  
243 figure 4). More indices selected two and six as the optimum number of clusters for the dataset,  
244 therefore for the analysis we presented the cluster phenotypes up to  $k = 6$  (Supplementary  
245 figure 5).

246

247 As the number of clusters increased, further clusters were generally created as subsets of one  
248 existing cluster at each step of  $k$  (Figure 2). One exception was the creation of cluster 2 at  $k = 3$ ,  
249 which was formed as a large branch from two existing clusters. At  $k = 4$  a small cluster was



250 formed defined by a group of patients characterised by non-specific coding (discussed further  
251 later).  
252

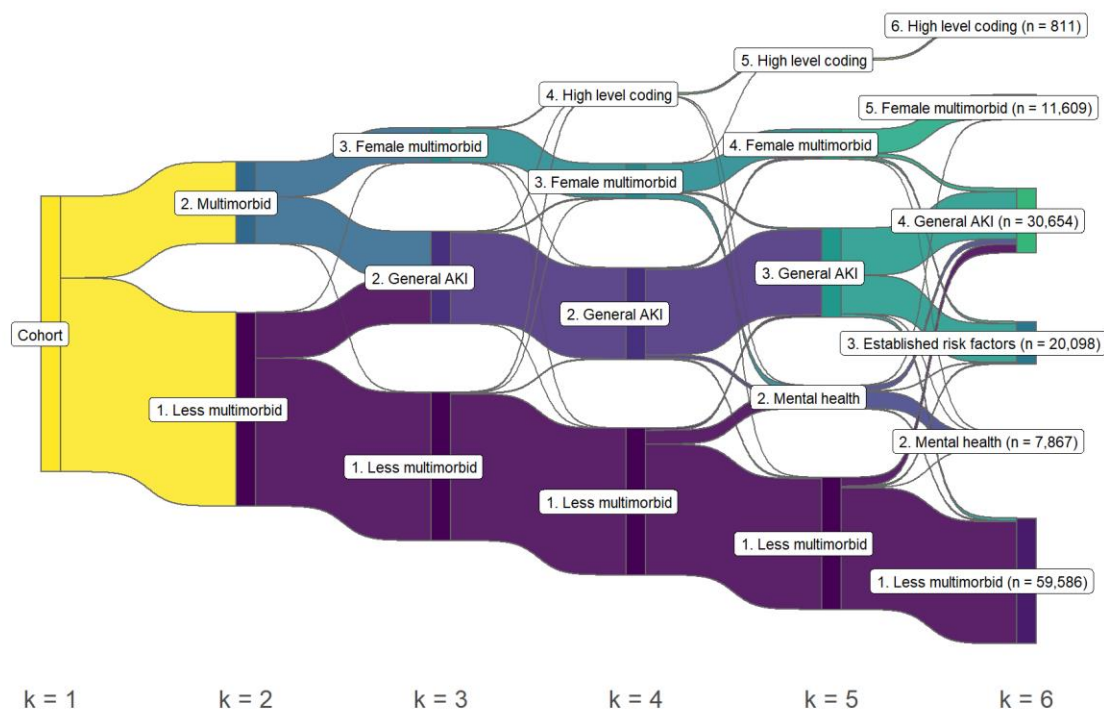

253  
254 **Figure 2:** Sankey diagram of clustering assignment by k-means at each step of k for a total of 6 clusters.  
255

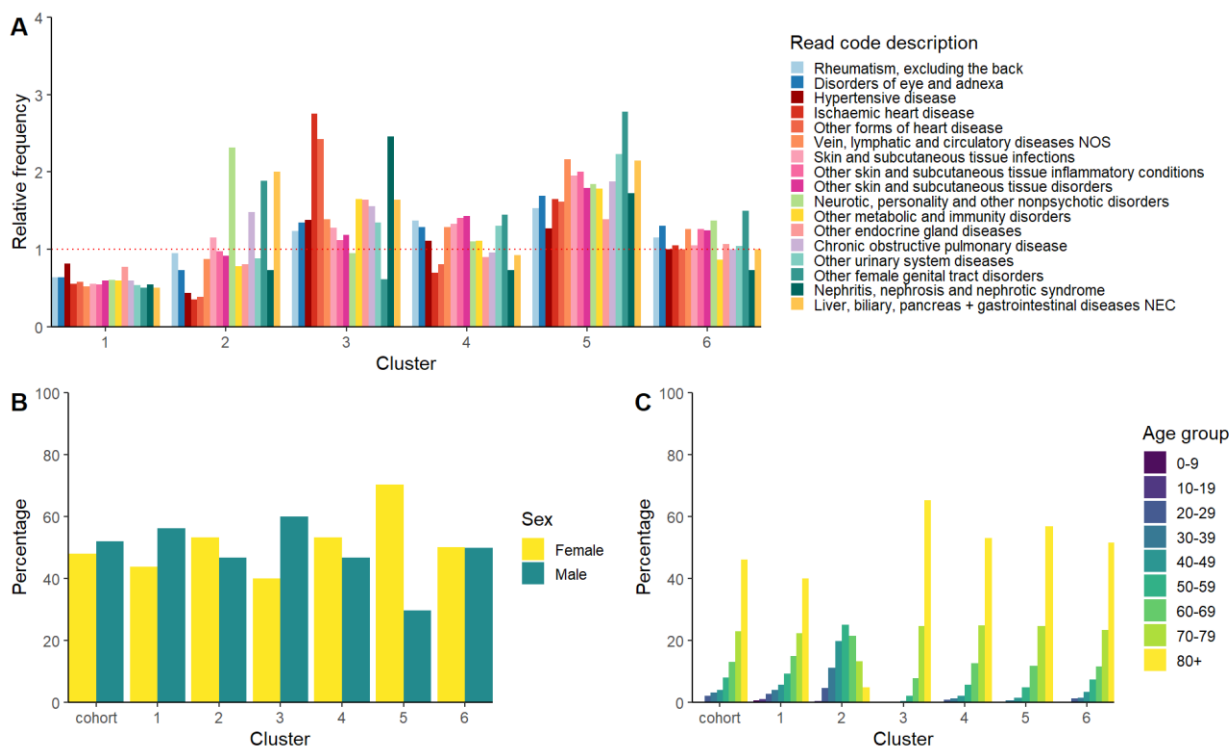

256  
257  
258 **Figure 3: Cluster characteristics.** Stratified by A) Relative frequency of cluster characteristics compared to overall cohort characteristics. B) Proportion by sex of each cluster and overall cohort. C) Percentage by  
259  
260 age groups of each cluster and overall cohort.

261  
262 We identified the following six broadly defined phenotypes from the cluster classification based  
263 on the dominant characteristics in each cluster (Figure 3, Supplementary table 5 -  
264 Supplementary table 9):

265  
266 Cluster 1 (Less multi-morbid phenotype): The largest cluster contained 59,586 patients defined  
267 by a younger age profile with median age of 75 (IQR: 61-85) vs. 78 (IQR: 66-86) in the cohort  
268 overall. Across the selected 17 disease codes, there were 18-50% fewer codes in this group of  
269 patients. Codes were highest for hypertensive disease (45%), rheumatism (41%), and disorders  
270 of eye and adnexa (33%).

271  
272 Cluster 2 (Younger, mental health phenotype): The youngest cluster with median age 55 (IQR:  
273 45-66). There were 7,867 patients in the cluster with 88% with a record of non-psychotic mental  
274 health disorders. Codes were also higher for female genital tract disorders (34%), and liver  
275 biliary, pancreas and gastrointestinal diseases (28%). 34% of patients had alcohol dependence  
276 syndrome, compared to 4% in the cohort overall (Supplementary table 10).

277  
278 Cluster 3 (Established risk factors phenotype): Contained 20,098 patients, with a higher  
279 percentage of men and the oldest profile of patients with a median age of 83 (IQR: 76-88). This  
280 cluster was defined by a higher percentage of established risk factors for AKI. People had a  
281 higher proportion of cardiovascular disease codes with 2.7 times more ischemic heart disease

282 (55%), 2.4 times more other forms of heart disease including heart failure (63%), 1.4 times more  
283 vein, lymphatic, and circulatory disease (43%), and 1.4 times more hypertensive disease (76%).  
284 Furthermore, 51% had other endocrine gland diseases including diabetes and 27% had codes  
285 for nephritis, nephrosis, and nephrotic syndrome (including acute and chronic renal failure  
286 codes), which was the highest percentage between the different clusters for both sets of codes.  
287

288 Cluster 4 (General AKI phenotype): Contained 30,654 patients defined by a more typical  
289 phenotype of patient characteristics given no particular codes and conditions stood out. Few  
290 characteristics differed substantially from the overall cohort, although with a slightly higher  
291 proportion of patients with hypertensive disease (61%), rheumatism (88%), and other forms of  
292 skin and subcutaneous tissue infections, inflammatory conditions, and disorders. There were  
293 slightly more women in this group (53%) and slightly older than the cohort with a median age of  
294 80 (IQR: 71-87).  
295

296 Cluster 5 (Female multimorbid phenotype): Contained 11,609 patients with 70% female and  
297 older than the cohort overall with a median age of 81 (IQR: 73-88). Furthermore, patients in this  
298 cluster had 2.7 times more genital tract disorders (50%) such as menopausal and  
299 postmenopausal disorders, and 1.8 times more codes for non-psychotic mental disorders  
300 (70%). People in this cluster also had 2.2 times higher percentage of other urinary system  
301 diseases (58%), 2.2 times higher vein, lymphatic, and circulatory disease (67%), and 2.1 times  
302 higher percentage for liver, biliary, pancreas and gastrointestinal diseases (30%) codes than the  
303 overall cohort.  
304

305 Cluster 6 (High level coding phenotype): Was a small cluster of 811 patients who were defined  
306 by a high proportion of high level diagnostic codes. For example, rather than having a code for  
307 hypertensive disease or heart failure, only a broad code is recorded such as 'circulatory system  
308 disease'. Most frequently recorded were Read codes for digestive system disease (67%),  
309 circulatory system disease (55%), genitourinary system disease (55%), and respiratory system  
310 disease (51%) (Supplementary table 7).  
311

### 312 **Cluster time series**

313  
314 Seasonal patterns of AKI admissions were not observed for the cluster 2, 5, and 6 (Figure 4,  
315 Supplementary figure 6, Supplementary figure 7, Supplementary figure 8) while they were  
316 evident for cluster 1, 3, and 4. In addition to seasonal trends, differences in changing incidence  
317 were observed between clusters during the study period. The incidence of weekly admissions  
318 remained stable for cluster 5 and 6; increased for clusters 1, 4, and 2; declined for cluster 3  
319 (Supplementary figure 5).  
320

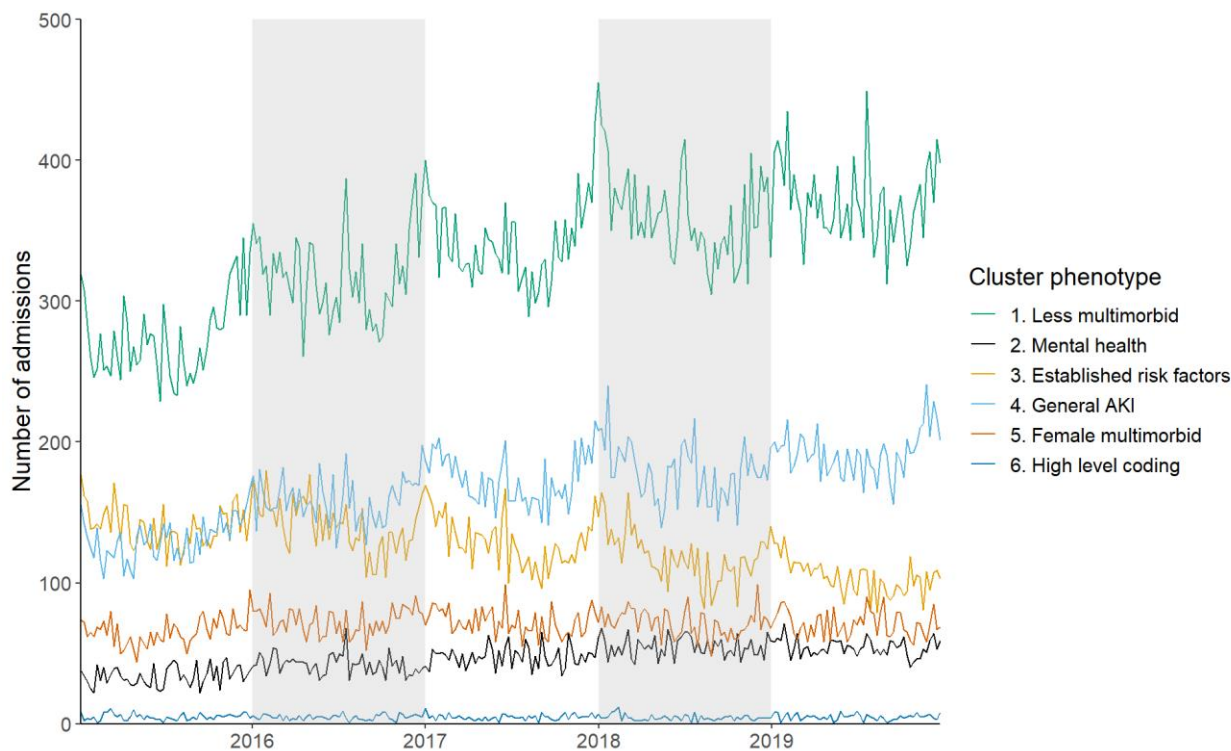

321  
322 **Figure 4:** Time series of weekly AKI admissions, 2015 - 2019, England, by assigned cluster.  
323

324 **Sensitivity analysis**

325  
326 When conducting sensitivity analyses, the same phenotypes were identified as the primary  
327 analysis when 1) we restricted the cohort to those coded with N17 only 2) we restricted the  
328 cohort to those who had AKI recorded only in a primary diagnostic position and separately for  
329 those who had AKI recorded only in a secondary diagnostic position, 3) when we restricted the  
330 cohort to those who were diagnosed on admission (day 0), and 4) when setting random seeds  
331 for reproducibility.

332  
333 We conducted a sensitivity analysis of 5) the number of dimensions included in the cluster  
334 analysis, and included 461 dimensions following MCA; equivalent to covering 70% of the  
335 variance explained in the dataset (Supplementary figure 9). Five cluster phenotypes remained  
336 the same when increasing the number of dimensions. One cluster, the mental health phenotype,  
337 was replaced with a small cluster (129 patients) of patients with musculoskeletal or connective  
338 tissue diseases.

339  
340 **Discussion**

341  
342 Our results demonstrate that admissions involving AKI in England between 2015-2019 show a  
343 seasonal pattern with the highest peaks in December/January and further increases in  
344 June/July, coinciding with heatwaves. Admissions for people aged over 80 years showed the  
345 greatest winter seasonal increases, as well as those where AKI was diagnosed on admission  
346 suggesting the onset and cause may have been community acquired.

347

348 Using unsupervised ML clustering to generate hypotheses in a data driven approach, we  
349 identified six phenotypes of AKI admissions, of which three demonstrated marked winter  
350 seasonality. These clusters were characterised by a general AKI phenotype, those with  
351 established risk factors phenotype, and those with a younger, less multi-morbid phenotype.  
352 Using clustering methods to describe phenotypes begins to hypothesise the different profiles of  
353 patients potentially predisposed to an increased risk of AKI in the winter.

354

## 355 **Results in context**

356

357 The observed seasonal increase of AKI in the winter months in England was consistent with  
358 previous studies which found increases in AKI reports and RRT use in the UK, and AKI  
359 admissions in Japan (4–6). However summer increases in AKI were not reported in these  
360 studies. These studies were not analysed on a weekly time scale and may not have been able  
361 to detect acute increases in admissions. Similar to findings in Japan, AKI admissions were most  
362 common in the elderly, and those diagnosed on admission, suggestive of community-acquired  
363 AKI (5). However, where pneumonia, UTIs, and sepsis were the most common primary  
364 diagnosis categories (where AKI was a secondary code) in this study, in Japan the most  
365 common admissions categories were cardiovascular and pulmonary disease. These differences  
366 may be a result of different coding practices and interpretations of primary admissions and not  
367 necessarily the underlying aetiology of AKI. The acute rise in AKI admissions we observed in  
368 the summer during heatwave alerts aligns with evidence linking increased ambient  
369 temperatures to an increased risk of AKI (8,22–28). This is an important observation given the  
370 current and increasing future impact of climate change.

371

372 Our study shows that people diagnosed with AKI have a complex multi-morbid profile and  
373 potentially have a number of mechanisms which may increase their risk of AKI, especially in  
374 winter. This is in keeping with the picture described by Philips et al, in which they found that  
375 seasonal increases in AKI affected most major medical specialities, suggesting a number of  
376 mechanisms through which AKI may increase in the winter (4).

377

378 Comparison of how the phenotypes identified in this work compare to other cluster classification  
379 studies is challenging given the large heterogeneity in approaches (29). Different methods of  
380 clustering, features included, dimension reduction techniques, and method of interpreting  
381 phenotypes (quantitative vs. qualitative) contributes to the heterogeneity in the characterisation  
382 of AKI phenotypes. Furthermore studies phenotype different subgroups of AKI such as those  
383 based on serum creatinine trajectories, severity, or biomarkers (all unavailable in this study)  
384 which further differentiate the clusters characterised from general AKI attendance (29). For  
385 example, Xu et al. used deep learning methods to characterise phenotypes of AKI patients in a  
386 critical care unit in Israel (30). The phenotypes they identified were mild, moderate, and severe  
387 kidney dysfunction which was associated with AKI stage 1, 2, and 3 respectively. Unlike our  
388 study, they found no comorbidities or demographic features defined the phenotypes identified.

389

## 390 **Limitations**



391  
392 Our study represents the most detailed examination of the seasonality of AKI in England to  
393 date. Using an unsupervised ML approach, we incorporated an unprecedented amount of data  
394 in order to be data-driven and hypothesis free and describe an objective picture of seasonal  
395 trends. However, there were several limitations to this approach. Firstly, only categorical  
396 features were included as part of phenotyping AKI (presence or absence of disease codes  
397 only). This excludes further clinical characteristics such as biomarkers, measures to determine  
398 severity of AKI, duration of AKI, or medication which could further contribute to the phenotype  
399 of AKI patients, although many of these features are not available in routine data. While the  
400 inclusion of the full clinical picture of patients with AKI at the scale needed to use machine  
401 learning may be challenging, phenotyping only diagnosis codes may bias the clinical picture and  
402 warrants caution in how these clusters are interpreted.

403  
404 A further limitation was that a low proportion of the variance was explained in each dimension  
405 following dimension reduction, suggesting each variable contributes only a small amount of the  
406 variance in the data. The sensitivity analysis, which accounted for 70% of the variance, did not  
407 alter five of the cluster phenotypes, indicating that the clusters identified through the primary  
408 analysis may be stable despite being based on only a few dimensions.

409  
410 While the use of Read codes enabled the examination of many diagnoses to describe clusters,  
411 it could have introduced biases in how clusters are formed due to large variation in the  
412 sensitivity and specificity of different codes. For example, using diagnostic codes alone  
413 underestimates the prevalence of CKD in CPRD (31,32) and this may have impacted on cluster  
414 formation, reducing their external validity. Assessment of the sensitivity and specificity of all 850  
415 codes included would be challenging and presents an important limitation of an unsupervised  
416 approach to clustering. While an approach that more accurately characterises underlying  
417 comorbidities could produce clusters with higher external validity, it would likely necessitate a  
418 targeted approach that is not entirely hypothesis-free. Heterogeneity in the sensitivity and  
419 specificity of disease codes also applies for ICD-10 codes recorded in HES, with changes over  
420 time, and therefore warrants caution in interpreting longer-term trends (32,33).

## 421 422 **Interpretation and future studies**

423 Our analysis of the time series data show that there are likely seasonal factors that lead to  
424 increases in AKI which is important for planning of health care services (such as surges in renal  
425 replacement therapy). AKI is a common syndrome which can lead to serious long term adverse  
426 outcomes and further evidence of seasonal increases warrants further attention of identifying  
427 which triggers, such as infectious diseases, account for the most burden. There is strong  
428 evidence of individual level associations of developing AKI following infections (7), and further  
429 studies are needed to establish whether this translates to population level drivers of AKI trends.  
430 In addition, it would be beneficial to quantify the patients at high risk, temperature triggers and  
431 burden of heat-related AKI to enable planning of appropriate responses in a changing climate.

432 Some individuals are more likely to be affected by winter-related triggers than others. This may  
433 be due to their underlying comorbidity profile (such as age, severity of CKD, or differences in

434 drug therapy. However, our results highlight that some individuals who develop AKI in winter  
435 have lower levels of comorbidities. This suggests that there may be interventions that reduce  
436 the risk of seasonal AKI such as identifying those at highest risk and ensuring vaccine uptake,  
437 optimisation of medications management, or increased provision of virtual clinics to improve  
438 management of long-term conditions.

439 To build on our study, alternative clustering methodologies like Guassian mixture models, or  
440 supervised classification methods using known predictive AKI features could be applied. Further  
441 stratification of AKI as proposed by Vaara et al. by serum creatinine trajectories or severity of  
442 AKI may further disentangle possible aetiologies of AKI phenotypes (29). This could be  
443 achieved by the inclusion of secondary care data in defining clusters.

444 In conclusion, our results demonstrate how AKI incidence in England has a distinct winter and  
445 summer (heat-related) seasonal pattern which has important implications on healthcare  
446 provision planning, public health, and clinical practice.

447

#### 448 **Contributors**

449

450 HB, FS, LT, RE contributed to the conception, design, analysis and interpretation of the data for  
451 the work. HB, AS, JM contributed to the acquisition and analysis of the data including  
452 developing and reviewing code. All authors contributed to revision of the manuscript, approved  
453 the final manuscript, and agreed to be accountable for all aspects of the work and publication.

454

#### 455 **Data sharing statement**

456

457 Access to data is available on request to the Clinical Practice Research Datalink. Data  
458 management and analysis code are available online at [https://github.com/ehr-  
459 lshtm/acute\\_kidney\\_injury\\_seasonality\\_ML](https://github.com/ehr-lshtm/acute_kidney_injury_seasonality_ML).

460

#### 461 **Declaration of interests**

462

463 All authors declare no conflicts of interest.

464

#### 465 **Acknowledgements**

466

467 We would like to acknowledge the funding support from the National Institute for Health and  
468 Care Research (NIHR) Health Protection Research Unit (HPRU) in Modelling and Health  
469 Economics, a partnership between UK Health Security Agency (UKHSA), Imperial College  
470 London, and London School of Hygiene and Tropical Medicine. The views expressed in the  
471 study are those of the authors and not necessarily those of the National Health Service, NIHR,  
472 UK Department of Health or UKHSA. The views and opinions expressed herein are the authors'  
473 own and do not necessarily state or reflect those of European Centre for Disease Prevention  
474 and Control (ECDC). We would also like to acknowledge Professor Elizabeth Williamson and  
475 Dr. Thomas Cowling for their invaluable advice.



476 **References**

477

- 478 1. Rewa O, Bagshaw SM. Acute kidney injury—epidemiology, outcomes and economics. *Nat*  
479 *Rev Nephrol.* 2014 Apr;10(4):193–207.
- 480 2. Wang HE, Muntner P, Chertow GM, Warnock DG. Acute Kidney Injury and Mortality in  
481 Hospitalized Patients. *Am J Nephrol.* 2012;35(4):349–55.
- 482 3. Challiner R, Ritchie JP, Fullwood C, Loughnan P, Hutchison AJ. Incidence and  
483 consequence of acute kidney injury in unselected emergency admissions to a large acute  
484 UK hospital trust. *BMC Nephrol.* 2014 Dec;15(1):84.
- 485 4. Phillips D, Young O, Holmes J, Allen LA, Roberts G, Geen J, et al. Seasonal pattern of  
486 incidence and outcome of Acute Kidney Injury: A national study of Welsh AKI electronic  
487 alerts. *Int J Clin Pract.* 2017;71(9):e13000.
- 488 5. Iwagami M, Moriya H, Doi K, Yasunaga H, Isshiki R, Sato I, et al. Seasonality of acute  
489 kidney injury incidence and mortality among hospitalized patients. *Nephrol Dial Transplant.*  
490 2018 Aug 1;33(8):1354–62.
- 491 6. Redahan L, Harris S, Ostermann M, Harrison D, Rowan K. An exploratory analysis of the  
492 utilisation of renal replacement therapy in critically ill adults in England, Northern Ireland and  
493 Wales. *Nephrol Dial Transplant.* 2016 May 1;31(suppl\_1):i147–8.
- 494 7. Mansfield KE, Douglas IJ, Nitsch D, Thomas SL, Smeeth L, Tomlinson LA. Acute kidney  
495 injury and infections in patients taking antihypertensive drugs: a self-controlled case series  
496 analysis. *Clin Epidemiol.* 2018;10:187–202.
- 497 8. Selby NM. Acute kidney injury changes with the seasons. *Nephrol Dial Transplant.* 2018  
498 Aug 1;33(8):1281–3.
- 499 9. Stewart S, McIntyre K, Capewell S, McMurray JJV. Heart failure in a cold climate. *J Am Coll*  
500 *Cardiol.* 2002 Mar;39(5):760–6.
- 501 10. Yamamoto Y, Shirakabe A, Hata N, Kobayashi N, Shinada T, Tomita K, et al. Seasonal  
502 variation in patients with acute heart failure: prognostic impact of admission in the summer.  
503 *Heart Vessels.* 2015 Mar;30(2):193–203.
- 504 11. Arntz H. Diurnal, weekly and seasonal variation of sudden death. Population-based analysis  
505 of 24061 consecutive cases. *Eur Heart J.* 2000 Feb 15;21(4):315–20.
- 506 12. Bi Q, Goodman KE, Kaminsky J, Lessler J. What is Machine Learning? A Primer for the  
507 Epidemiologist. *Am J Epidemiol.* 2019 Dec 31;188(12):2222–39.
- 508 13. Li Y, Sperrin M, Ashcroft DM, Staa TP van. Consistency of variety of machine learning and  
509 statistical models in predicting clinical risks of individual patients: longitudinal cohort study  
510 using cardiovascular disease as exemplar. *BMJ.* 2020 Nov 4;371:m3919.
- 511 14. Nagamine T, Gillette B, Pakhomov A, Kahoun J, Mayer H, Burghaus R, et al. Multiscale  
512 classification of heart failure phenotypes by unsupervised clustering of unstructured  
513 electronic medical record data. *Sci Rep.* 2020 Dec 7;10(1):21340.
- 514 15. Alexander N, Alexander DC, Barkhof F, Denaxas S. Using Unsupervised Learning to  
515 Identify Clinical Subtypes of Alzheimer’s Disease in Electronic Health Records. *Stud Health*  
516 *Technol Inform.* 2020 Jun 16;270:499–503.
- 517 16. Cho MH, Washko GR, Hoffmann TJ, Criner GJ, Hoffman EA, Martinez FJ, et al. Cluster  
518 analysis in severe emphysema subjects using phenotype and genotype data: an exploratory  
519 investigation. *Respir Res.* 2010;11(1):30.
- 520 17. Arbet J, Brokamp C, Meinzen-Derr J, Trinkley KE, Spratt HM. Lessons and tips for  
521 designing a machine learning study using EHR data. *J Clin Transl Sci* [Internet]. 2021 ed  
522 [cited 2021 Jun 7];5(1). Available from: <https://www.cambridge.org/core/journals/journal-of-clinical-and-translational-science/article/lessons-and-tips-for-designing-a-machine-learning-study-using-ehr-data/1171DB7CA4E909DFF35079BEC743B78F>
- 523  
524  
525 18. Herrett E, Gallagher AM, Bhaskaran K, Forbes H, Mathur R, van Staa T, et al. Data

- 526 Resource Profile: Clinical Practice Research Datalink (CPRD). *Int J Epidemiol*. 2015  
527 Jun;44(3):827–36.
- 528 19. Nguyen LH, Holmes S. Ten quick tips for effective dimensionality reduction. *PLOS Comput*  
529 *Biol*. 2019 Jun 20;15(6):e1006907.
- 530 20. Charrad M, Ghazzali N, Boiteau V, Niknafs A. **NbClust**: An R Package for Determining the  
531 Relevant Number of Clusters in a Data Set. *J Stat Softw* [Internet]. 2014 [cited 2023 Jan  
532 11];61(6). Available from: <http://www.jstatsoft.org/v61/i06/>
- 533 21. Public Health England. PHE heatwave mortality monitoring [Internet]. Available from:  
534 <https://www.gov.uk/government/publications/phe-heatwave-mortality-monitoring>
- 535 22. Adeyeye TE, Insaf TZ, Al-Hamdan MZ, Nayak SG, Stuart N, DiRienzo S, et al. Estimating  
536 policy-relevant health effects of ambient heat exposures using spatially contiguous  
537 reanalysis data. *Environ Health*. 2019 Apr 18;18(1):35.
- 538 23. Barski L, Bartal C, Sagy I, Jotkowitz A, Nevzorov R, Zeller L, et al. Seasonal influence on  
539 the renal function in hospitalized elderly patients. *Eur Geriatr Med*. 2015 Jun 1;6(3):232–6.
- 540 24. Borg M, Bi P, Nitschke M, Williams S, McDonald S. The impact of daily temperature on  
541 renal disease incidence: an ecological study. *Environ Health Glob Access Sci Source*. 2017  
542 Oct 27;16(1):114.
- 543 25. Fletcher BA, Lin S, Fitzgerald EF, Hwang SA. Association of Summer Temperatures With  
544 Hospital Admissions for Renal Diseases in New York State: A Case-Crossover Study. *Am J*  
545 *Epidemiol*. 2012 May 1;175(9):907–16.
- 546 26. Kim SE, Lee H, Kim J, Lee YK, Kang M, Hijioka Y, et al. Temperature as a risk factor of  
547 emergency department visits for acute kidney injury: a case-crossover study in Seoul, South  
548 Korea. *Environ Health*. 2019 Jun 14;18(1):55.
- 549 27. Lim YH, So R, Lee C, Hong YC, Park M, Kim L, et al. Ambient temperature and hospital  
550 admissions for acute kidney injury: A time-series analysis. *Sci Total Environ*. 2018 Mar;616–  
551 617:1134–8.
- 552 28. McTavish RK, Richard L, McArthur E, Shariff SZ, Acedillo R, Parikh CR, et al. Association  
553 Between High Environmental Heat and Risk of Acute Kidney Injury Among Older Adults in a  
554 Northern Climate: A Matched Case-Control Study. *Am J Kidney Dis Off J Natl Kidney*  
555 *Found*. 2018 Feb;71(2):200–8.
- 556 29. Vaara ST, Bhatraju PK, Stanski NL, McMahon BA, Liu K, Joannidis M, et al. Subphenotypes  
557 in acute kidney injury: a narrative review. *Crit Care*. 2022 Aug 19;26(1):251.
- 558 30. Xu Z, Chou J, Zhang XS, Luo Y, Isakova T, Adekkanattu P, et al. Identifying sub-  
559 phenotypes of acute kidney injury using structured and unstructured electronic health record  
560 data with memory networks. *J Biomed Inform*. 2020 Feb;102:103361.
- 561 31. Ramagopalan S, Leahy TP, Stamp E, Sammon C. Approaches for the identification of  
562 chronic kidney disease in CPRD–HES-linked studies. *J Comp Eff Res*. 2020 May;9(7):441–  
563 6.
- 564 32. McDonald HI, Shaw C, Thomas SL, Mansfield KE, Tomlinson LA, Nitsch D. Methodological  
565 challenges when carrying out research on CKD and AKI using routine electronic health  
566 records. *Kidney Int*. 2016 Nov;90(5):943–9.
- 567 33. Quan H, Li B, Duncan Saunders L, Parsons GA, Nilsson CI, Alibhai A, et al. Assessing  
568 Validity of ICD-9-CM and ICD-10 Administrative Data in Recording Clinical Conditions in a  
569 Unique Dually Coded Database: Assessing Validity of ICD-9-CM and ICD-10. *Health Serv*  
570 *Res*. 2008 Jan 7;43(4):1424–41.
- 571  
572
